# Supplementary material for: Ultrafast metal corrosion engineering facilitates the construction of CoSx derived from MOFs as enhanced supercapacitor electrodes
Source: Royal Society of Chemistry journal article supplement (doi:10.1039/d4ta00413b), 2024-01-01
Supplement: d4ta00413b2.pdf [file d4ta00413b2.pdf]

Table S1 XPS semi-quantitative analysis results for Co<sup>2+</sup> and Co<sup>3+</sup>.

| <b>Element</b>         | <b>Peak position</b> | <b>FWHM</b><br><b>eV</b> | <b>Area(p)</b><br><b>CPS.eV</b> | <b>Atomic</b><br><b>%</b> |
|------------------------|----------------------|--------------------------|---------------------------------|---------------------------|
| <b>Co<sup>3+</sup></b> | 779.6                | 3.19                     | 14687.83                        | 21.21                     |
| <b>Co<sup>2+</sup></b> | 781.5                | 3.02                     | 54447.12                        | 78.79                     |
